# Supplementary material
Source: publisher site journal article supplement (https://www.dovepress.com/article/387223)
Supplement: Supplementary file 1 [file get_supplementary_file.php]

**﻿Supporting Information**


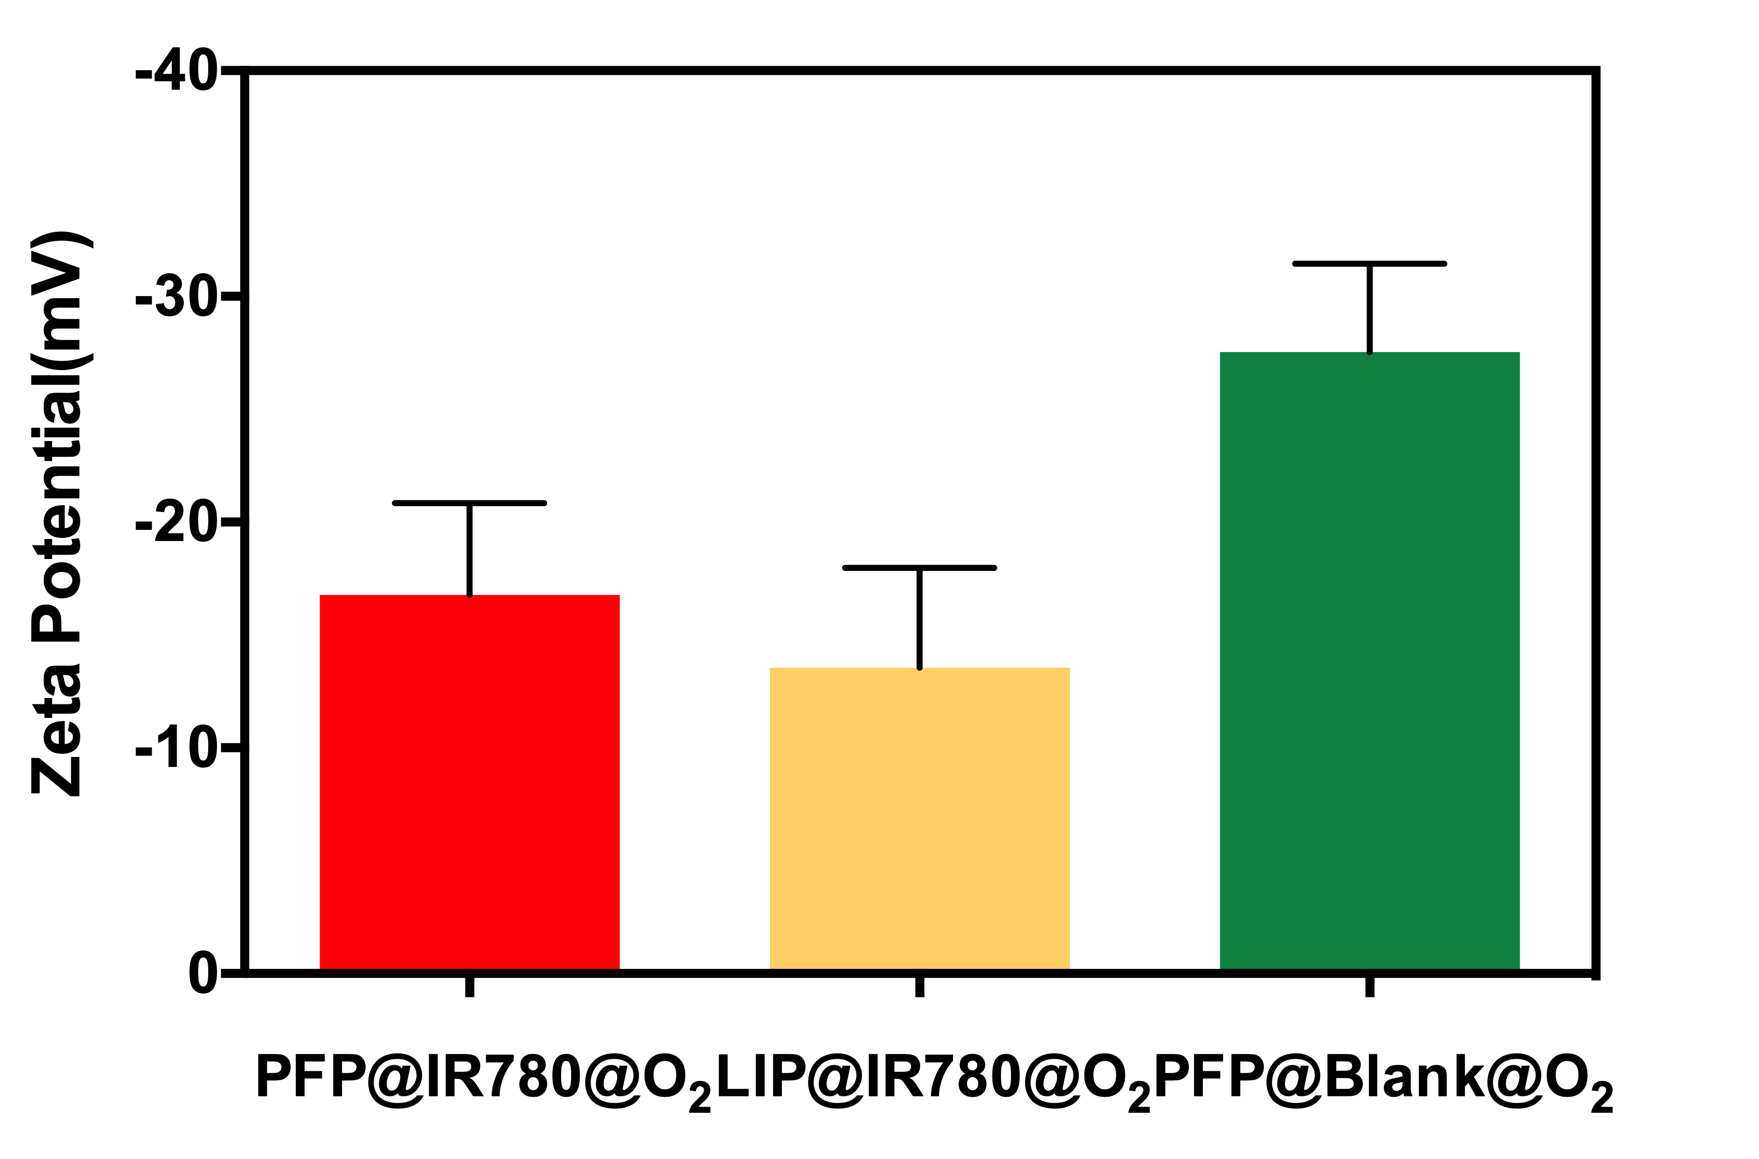


**Figure S1** Zeta potential of different nanoparticles.


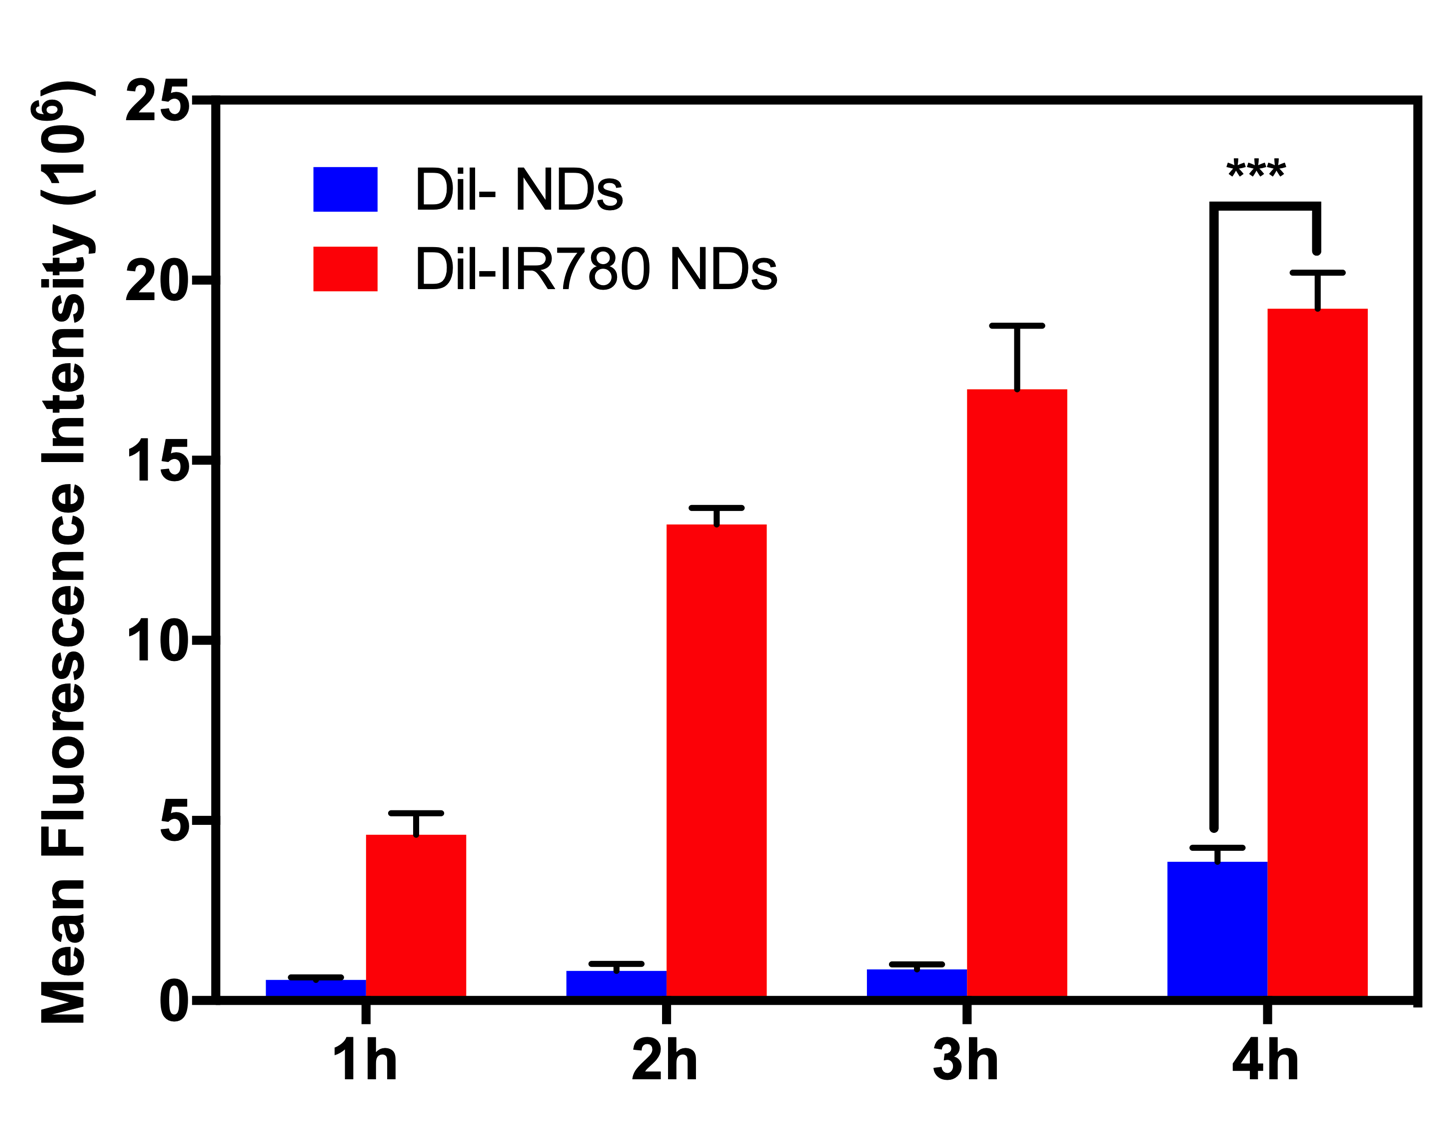


﻿**Figure S2** FL intensities of Hepa1-6 cells incubated with DiI-NDs or DiI-IR780 NDs for different durations of coincubation.


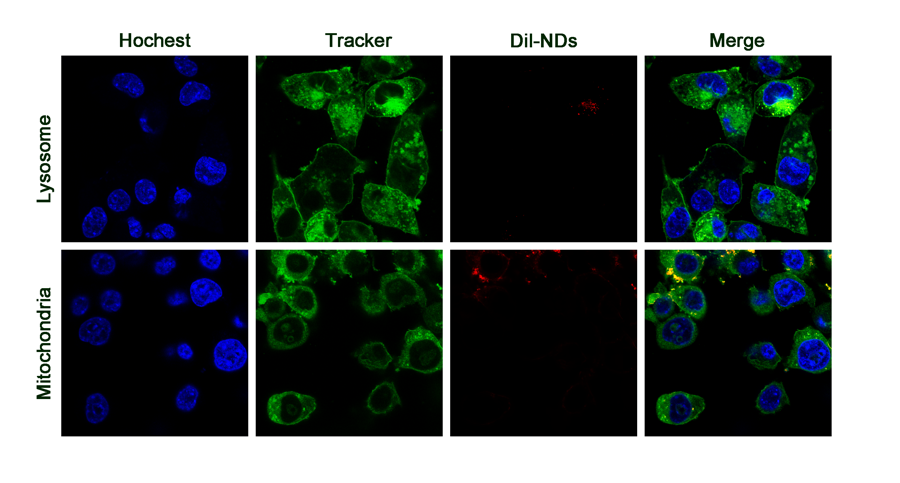


**Figure S3** Subcellular localization of DiI-NDs compared to lysosome and mitochondria trackers using CLSM. The scale bars are 20 μm.


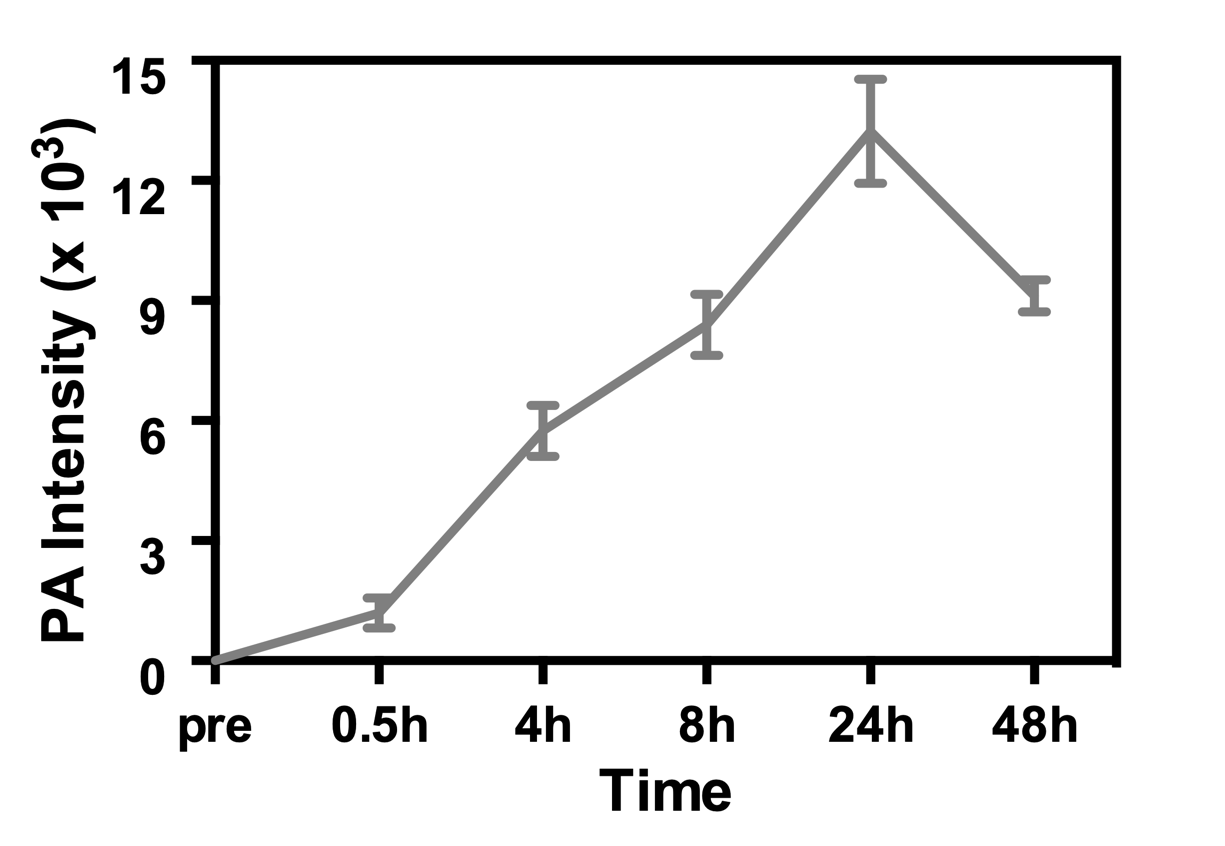


**Figure S4** The relative PA intensities changing at the tumor site at the corresponding time points.


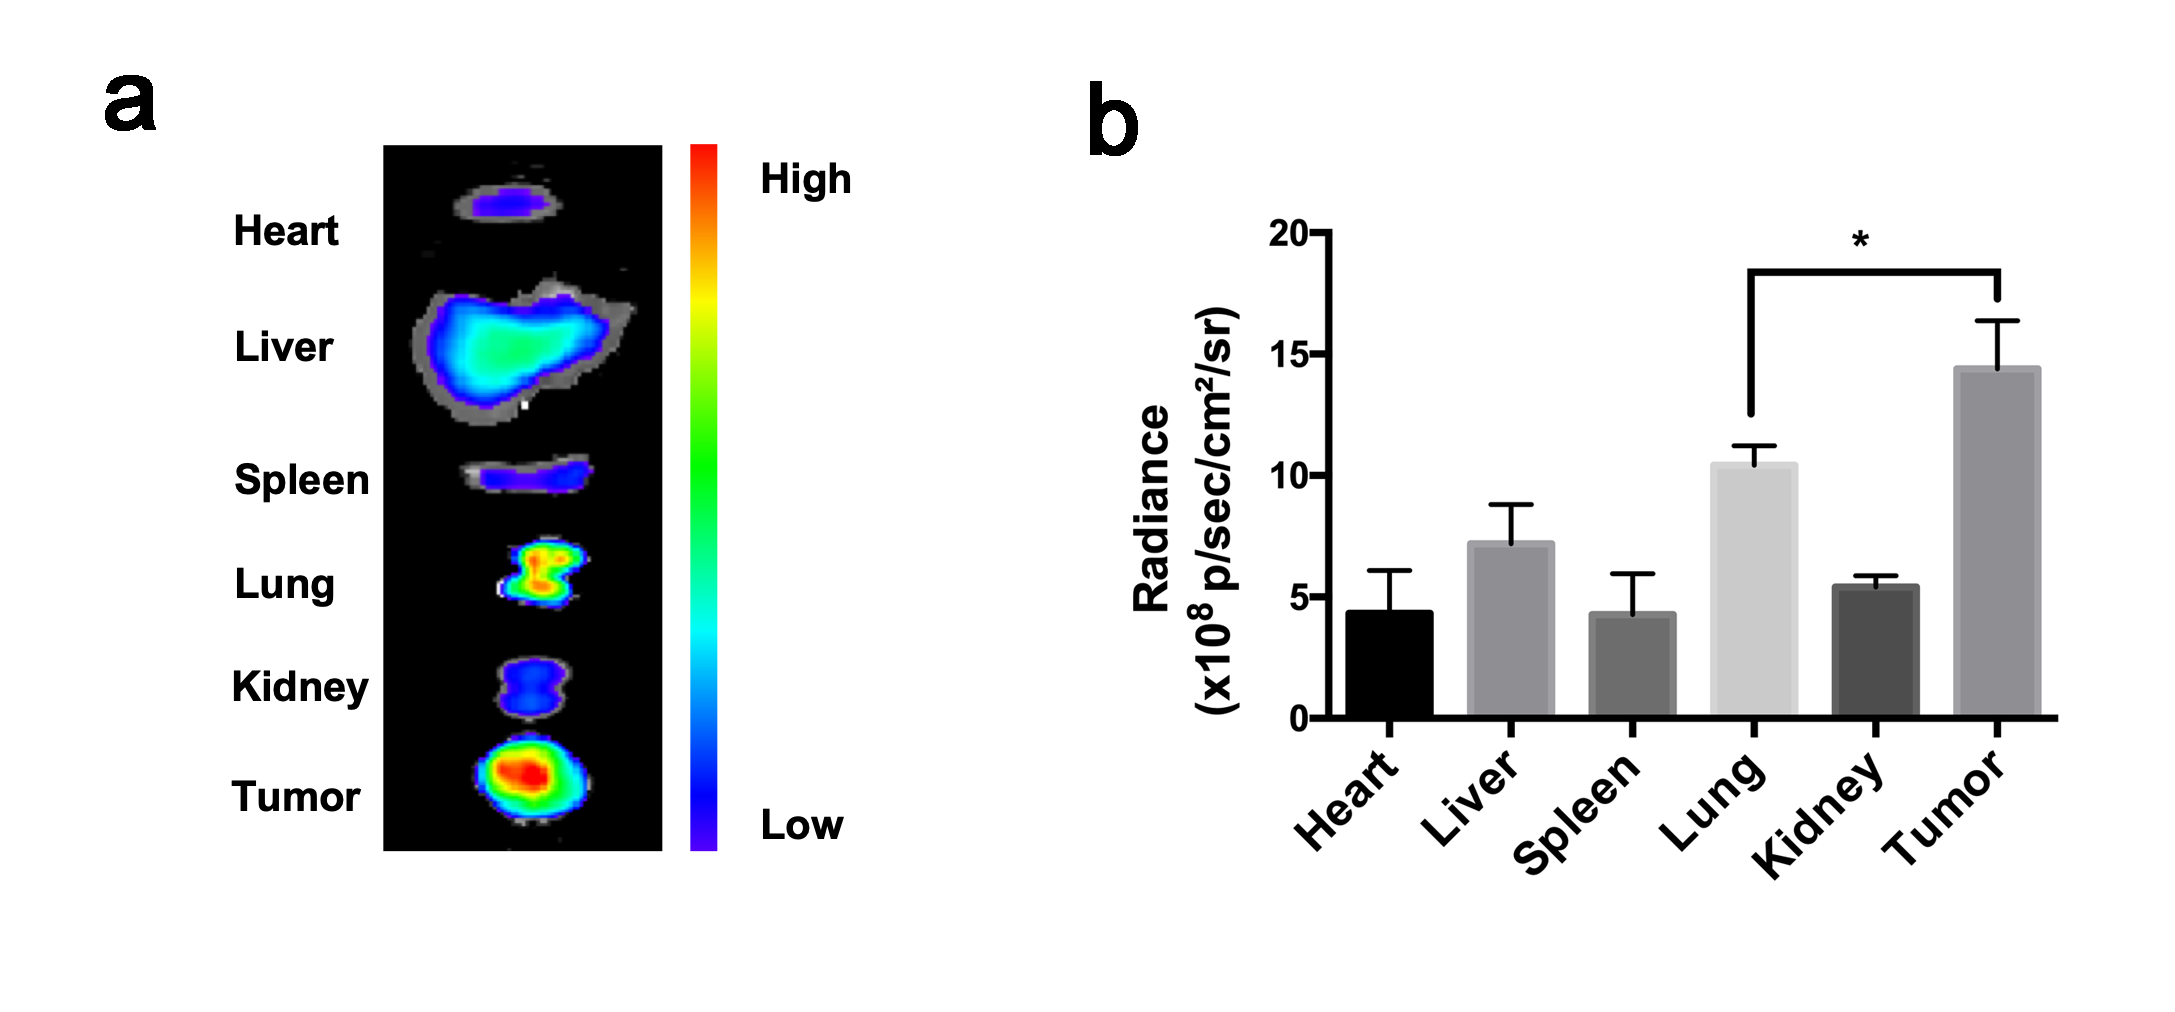


**Figure S5** Ex vivo biodistribution. (a) ﻿Ex vivo fluorescence images of major organs and the tumor collected 24 h post tail vein injection of PFP@IR780@O2. (b) Semi-quantitative biodistribution analysis of PFP@IR780@O2 in mice. (Data is shown as mean ± SD. n=3 per group. **p < 0.01)


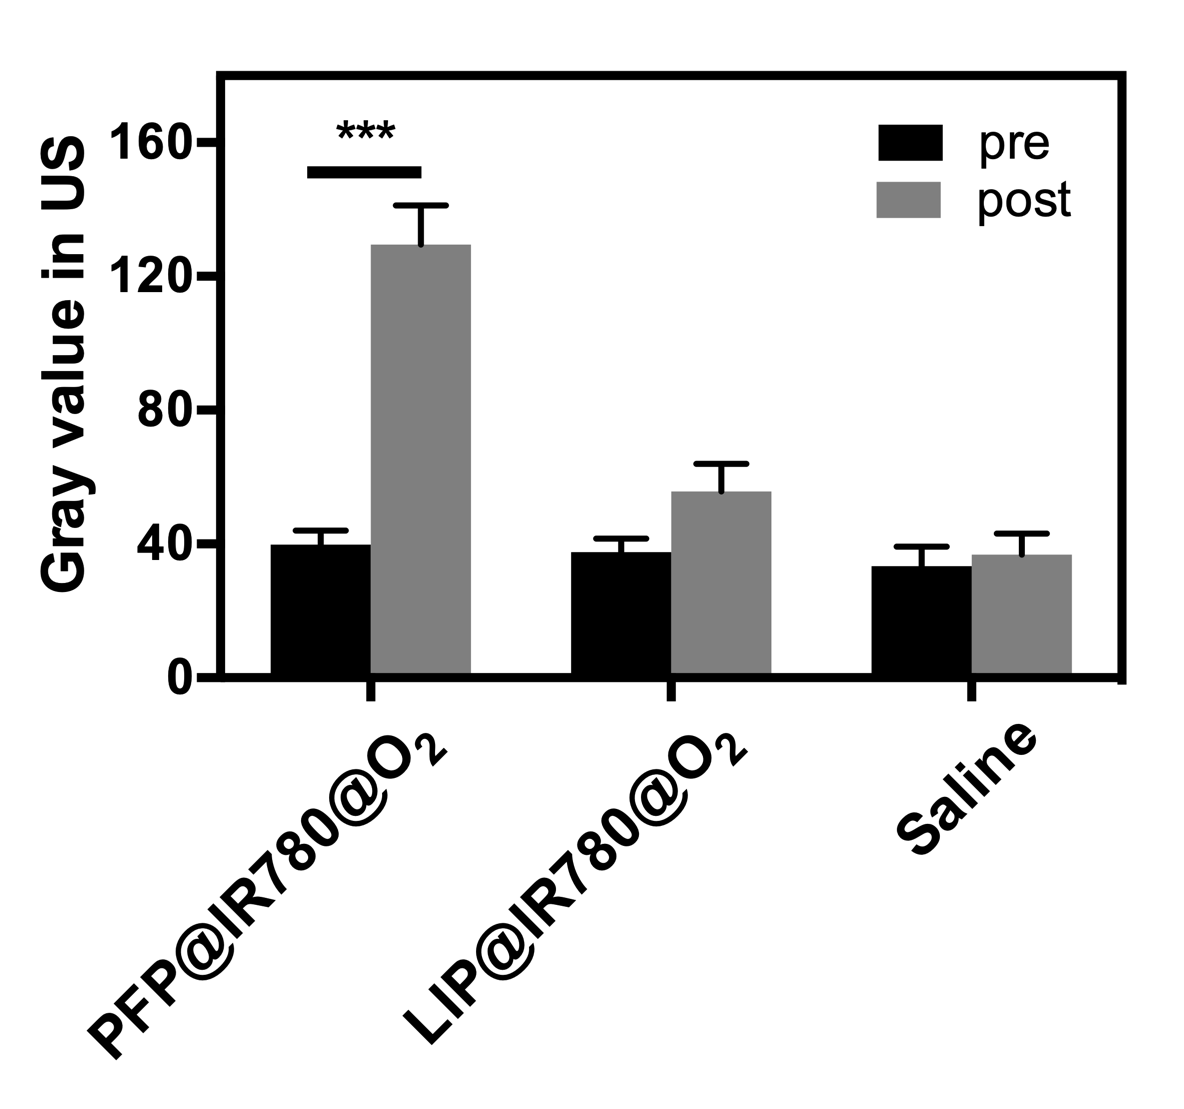


**Figure S6** The gray values in US mode of pre- and post-irradiation. (Data is shown as mean ± SD. n=3. ***p < 0.001)

﻿
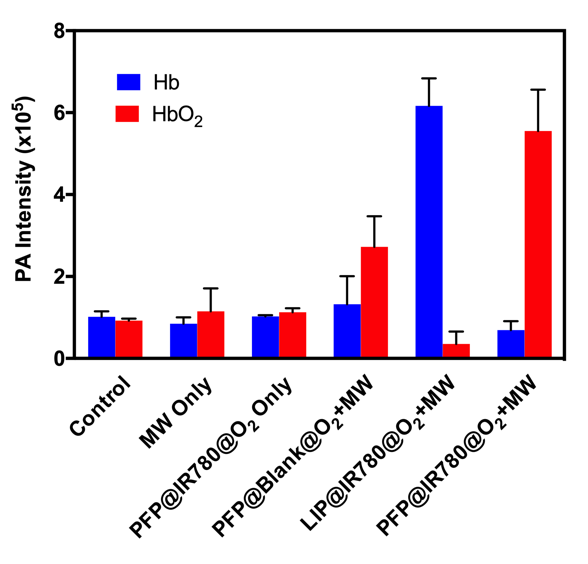


**Figure S7** PA intensity of HbO2 and Hb after different treatments.


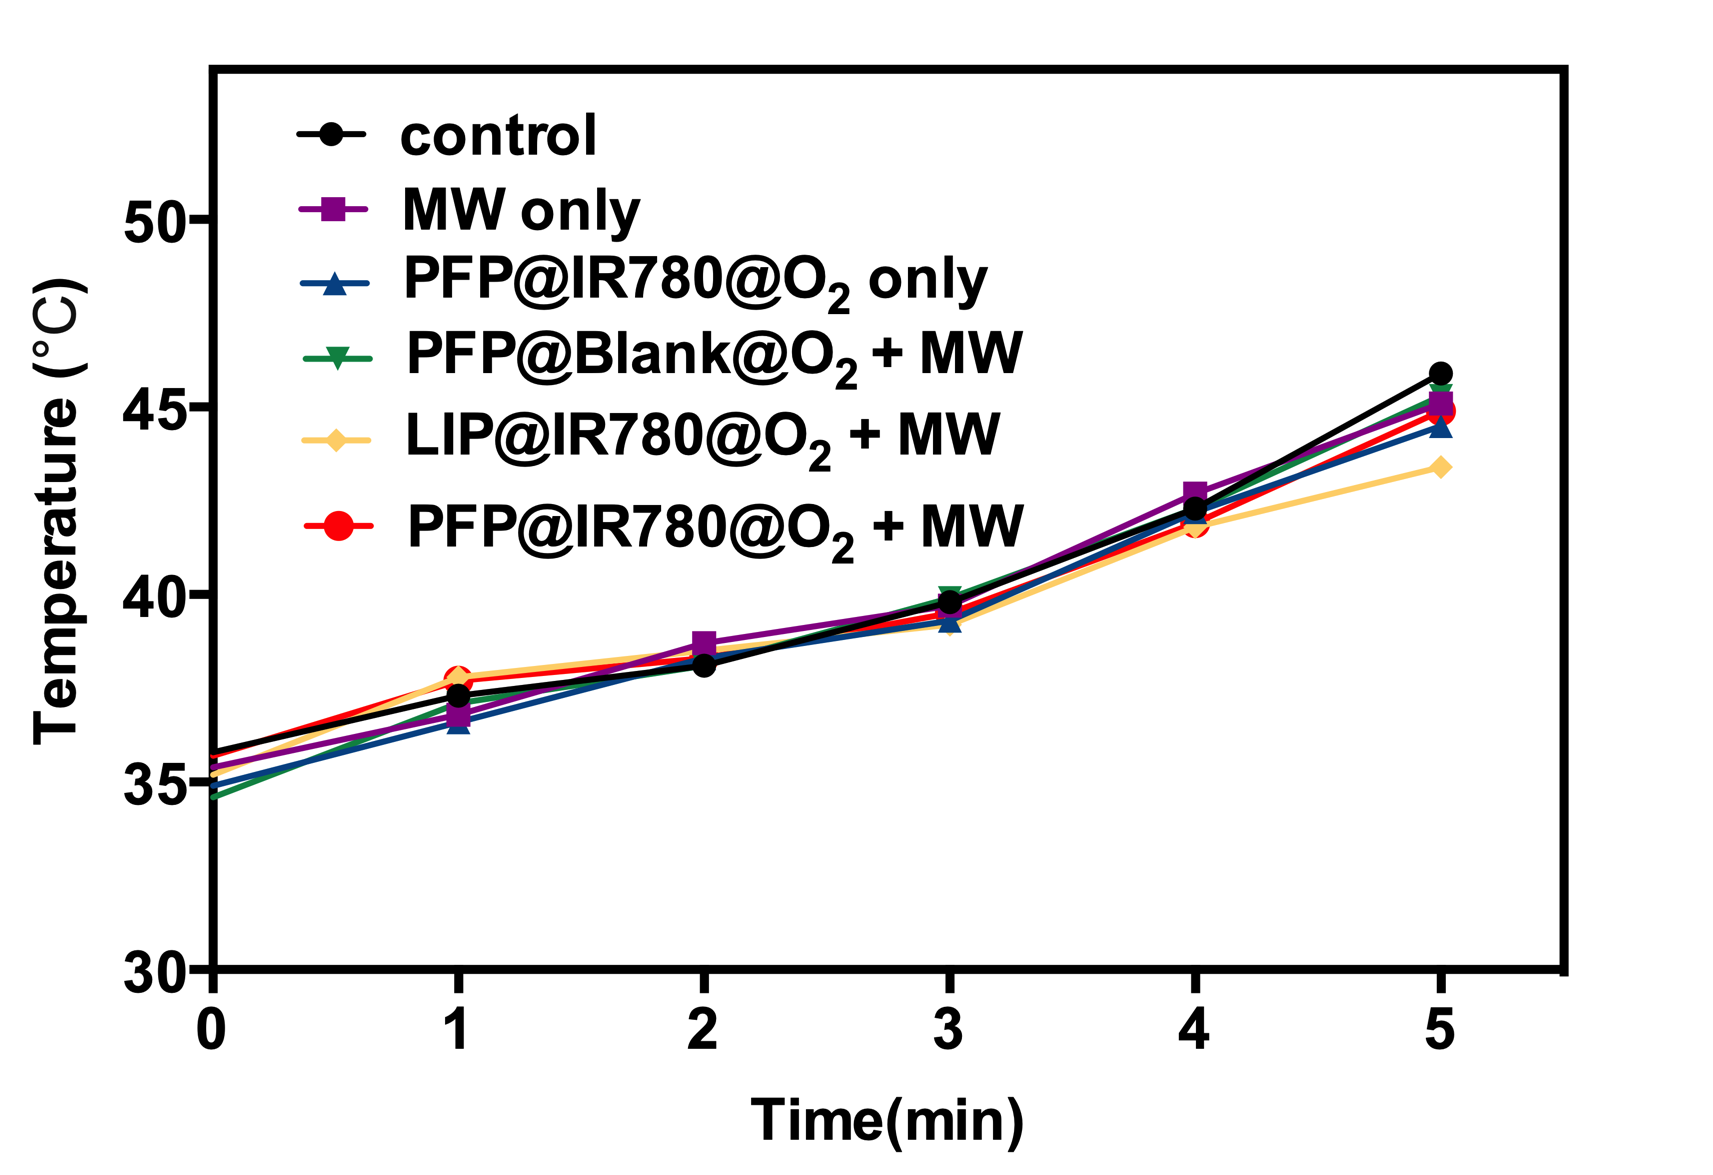


﻿**Figure S8** For ﻿subcutaneous tumor models, temperature curves of tumor surface with various treatments.


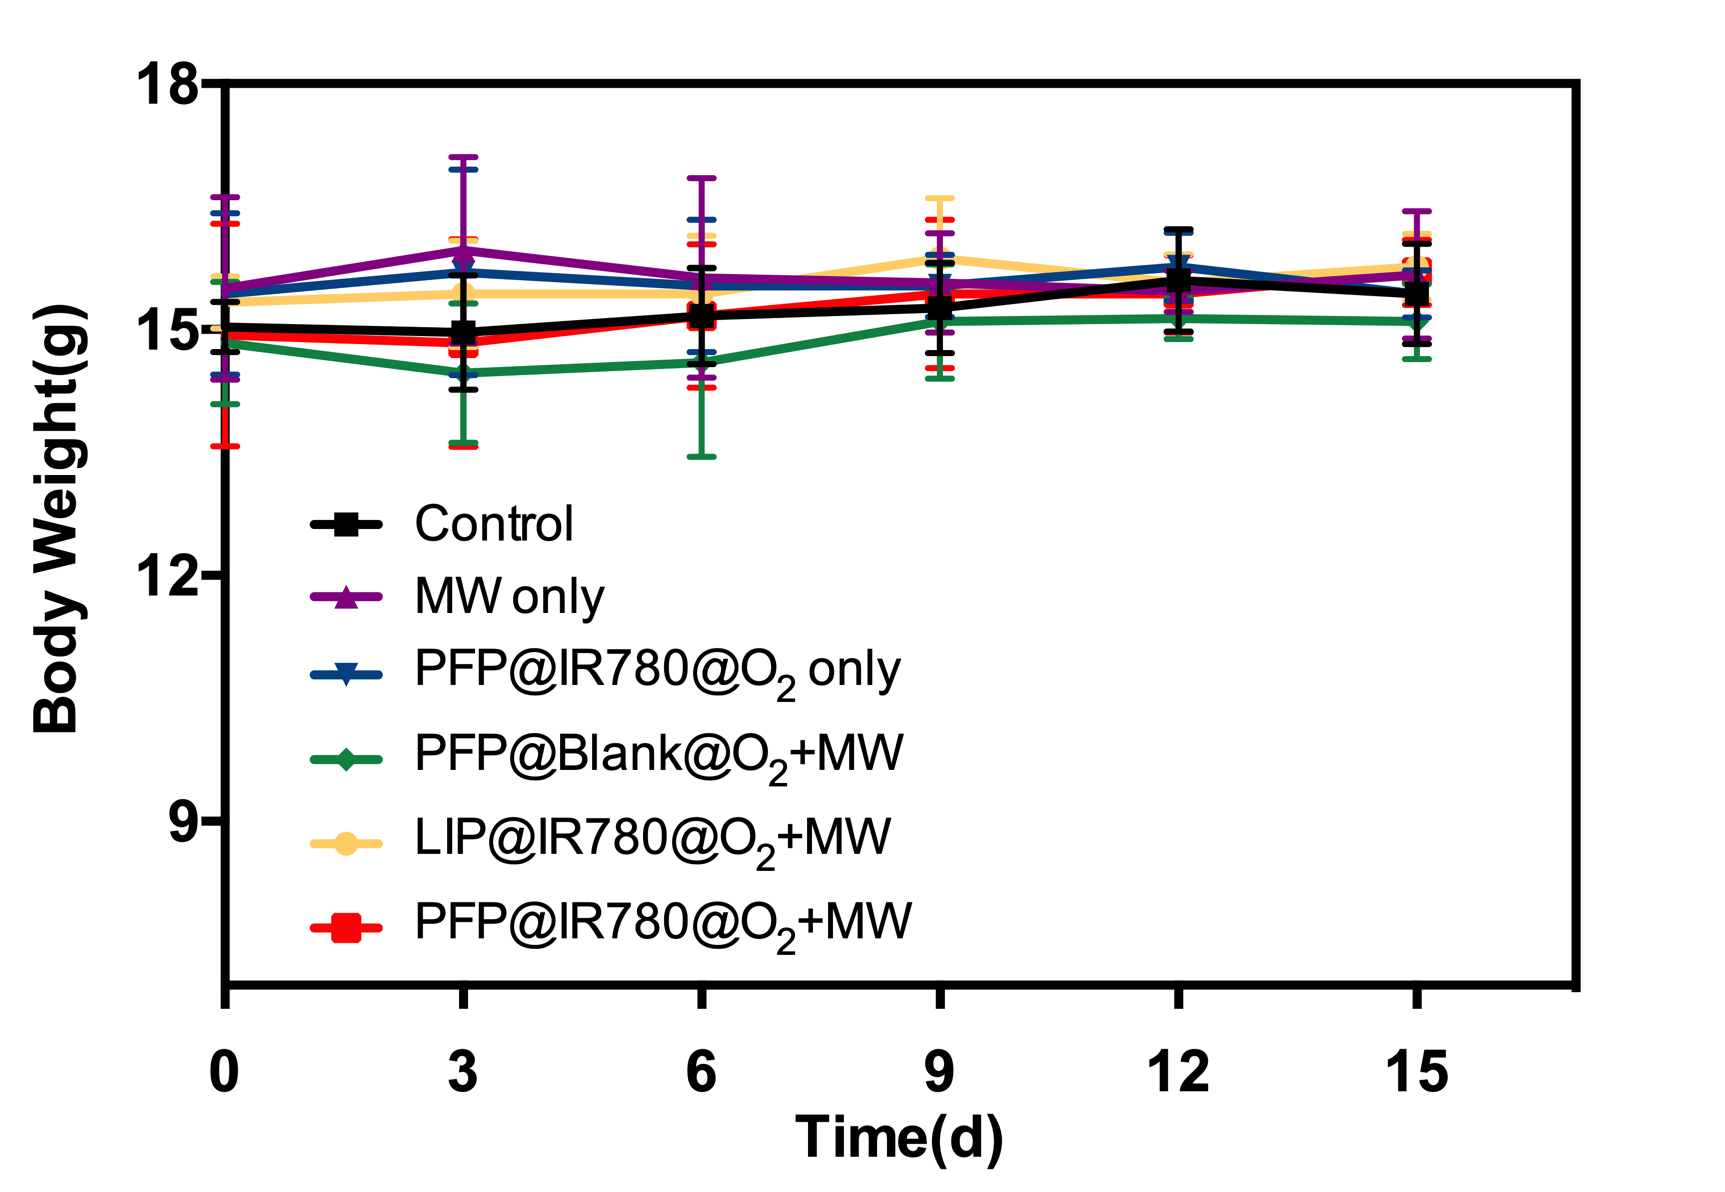


﻿ **Figure S9** For orthotopic tumor models, body weight changes of mice with various treatments.
